# Supplementary material
Source: publisher figshare collection journal article supplement (https://gsajournals.figshare.com/ndownloader/files/23775254)
Supplement: Supplementary file 1 [file 23775254]

Covariate	Factor 1	Factor 2	Factor 3	Factor 4	Factor 5	Factor 6	Factor 7	Factor 8	Factor 9	Factor 10
Sand	0.387014117	0.209615779	-0.370433514	0.247207318	-0.135857888	0.156672225	-0.080616403	-0.030500097	0.105860512	0.000262825
Silt	-0.511244458	-0.053309727	0.193183536	-0.144208088	0.085341701	0.187021133	0.092880503	0.022463971	-0.046211145	-0.047142102
Clay	0.087242288	-0.266302201	0.331978962	-0.20005997	0.10198254	-0.517266698	0.000690122	0.018213689	-0.107544644	0.065786695
MeanLowTemp_1	-0.154701576	0.838980817	-0.321515264	-0.262531538	-0.021381344	-0.210309006	-0.050698912	0.028754539	0.03190465	-0.102752022
MeanLowTemp_2	0.262993745	0.846025075	0.025271646	0.114910604	0.116912159	0.018716715	0.063379035	0.059869154	0.217893243	0.083761507
MeanLowTemp_3	0.702333783	0.418648071	-0.115830126	0.198348654	0.07482722	-0.009170708	-0.035984787	0.151743836	0.419198695	0.00012248
MeanLowTemp_4	0.92254705	0.147119907	-0.008644354	0.04340101	0.201091767	-0.069091773	0.047073262	-0.003752128	0.162879635	-0.181816345
MeanLowTemp_5	0.951958795	0.017109863	-0.009233943	0.105823988	0.030095272	-0.093266877	-0.046415646	0.00995763	0.203717229	0.127054003
MeanTemp_1	-0.230138491	0.850943063	-0.259150044	-0.226095262	-0.102806189	-0.146417447	-0.192740133	0.011365721	-0.083586332	-0.120620413
MeanTemp_2	0.243045984	0.838771491	0.06441664	0.367815963	0.027169231	0.054547211	0.058939676	0.034376112	0.090633875	0.112668733
MeanTemp_3	0.724964158	0.464772422	-0.067935925	0.212028582	-0.122308659	0.155729947	0.030137922	0.151695279	0.282450635	-0.044671248
MeanTemp_4	0.962488328	0.15267611	0.02000208	0.039929866	-0.004201566	0.016126675	0.080262802	0.000500676	0.078594909	-0.163557606
MeanTemp_5	0.972667903	0.017575441	0.039527525	0.064777933	-0.045467017	-0.061392209	0.006779836	0.062069811	0.10738605	0.148059703
MeanHighTemp_1	-0.186451912	0.818539865	-0.22470269	-0.169849372	-0.17633368	-0.069102634	-0.329384457	0.017986675	-0.151305072	-0.14723576
MeanHighTemp_2	0.285853614	0.759441531	0.050809965	0.495022991	0.022555872	0.042486896	0.030264262	0.010690825	0.018078976	0.166572054
MeanHighTemp_3	0.625737843	0.492037561	-0.113638918	0.203973735	-0.284629091	0.227972799	0.085031195	0.144954654	0.028699768	-0.043831737
MeanHighTemp_4	0.913733558	0.211471656	-0.027565982	0.022904573	-0.172997071	0.074079389	0.121307353	0.00680499	-0.044942334	-0.127227229
MeanHighTemp_5	0.959178145	0.051232689	0.045486977	0.01927673	-0.094932903	-0.005170632	0.046908335	0.123464595	-0.022294549	0.185662736
MeanDewPoint_1	-0.139648313	0.67370228	-0.335576427	-0.264454403	0.061183754	-0.280024353	0.204256556	0.232227828	0.086594393	-0.008591828
MeanDewPoint_2	0.177567204	0.808020386	-0.03199608	-0.215783404	0.185249388	-0.003351891	0.105842506	0.210000067	0.150846169	0.172918881
MeanDewPoint_3	0.595315646	0.474315505	-0.131596107	-0.017908675	0.330368775	-0.021360031	0.015023755	0.185484278	0.376792211	0.190155892
MeanDewPoint_4	0.825688875	0.125299815	-0.032827569	-0.076948883	0.481879698	-0.050665536	0.075609285	0.013703836	0.146083924	-0.078388158
MeanDewPoint_5	0.933541864	-0.048504314	-0.028254268	0.055584198	0.193339471	-0.042898657	-0.073314791	-0.020537418	0.186938146	0.17023352
MeanHumid_1	0.118821664	-0.010351532	-0.259227752	-0.083930421	0.220020095	-0.284100451	0.573228019	0.29057241	0.175118403	0.160965217
MeanHumid_2	-0.041649576	0.147777654	-0.221362031	-0.773087693	0.250867823	-0.103848513	0.032450344	0.18865823	-0.021085754	0.092128244
MeanHumid_3	0.002694	0.146683499	-0.218258402	-0.287223476	0.689119054	-0.286618032	-0.052238426	0.022897077	0.127507791	0.328386589
MeanHumid_4	-0.060592757	-0.036161294	-0.164540731	-0.193986144	0.919449939	-0.124207006	-0.014738355	-0.052317312	0.020301696	0.094450078
MeanHumid_5	0.094338895	-0.21914056	-0.260577565	-0.021815323	0.722550757	0.066864	-0.278808414	-0.312530457	0.132146732	0.097476566
MeanWind_1	0.179857555	-0.100694372	0.834929222	-0.008877811	-0.035139019	0.180791661	-0.122051493	-0.012305149	-0.070158797	0.04390741
MeanWind_2	0.100769474	-0.151370139	0.923379094	-0.020964831	0.037816538	0.087597167	-0.072188956	-0.11685014	-0.055730698	-0.034789637
MeanWind_3	0.239709594	-0.109708365	0.866719048	0.176394535	-0.03563689	-0.090394214	-0.010424551	-0.017361536	0.027904711	0.010804583
MeanWind_4	-0.108907094	-0.159212262	0.858117159	0.016791814	-0.103459281	-0.153862325	0.077359689	0.075045568	-0.005004205	-0.074393708
MeanWind_5	-0.157459691	0.047431166	0.852094753	0.033119178	-0.098868714	-0.068338486	-0.026242327	0.094840018	0.111406797	0.022727751
RainAccum_1	0.083949285	0.137178113	-0.080970176	-0.102222417	-0.164885477	0.112421479	0.564765679	-0.014292579	-0.109686396	-0.033228489
RainAccum_2	-0.072984372	0.033472811	0.235276944	-0.3741627	0.106822408	0.179877071	0.03547406	0.105296691	-0.08144443	-0.016822768
RainAccum_3	0.271476754	0.04288752	0.061610817	0.062042237	0.168304873	-0.438280011	-0.049344922	0.047292258	0.145200596	0.068295711
RainAccum_4	-0.1226846	0.067510303	0.144887176	-0.065460897	0.517316135	0.084801601	0.164581733	-0.038645806	-0.031324117	-0.183282152
RainAccum_5	-0.016284134	-0.120930028	0.157473945	0.297896265	0.387120516	0.089853302	0.063586617	-0.481562681	0.054429476	-0.040245323
PercentDaysWithRain_1	-0.14631105	-0.048090984	0.016847094	-0.110068259	-0.063892268	0.213911631	0.586303788	-0.033932212	-0.005933102	-0.149546983
PercentDaysWithRain_2	-0.053190841	-0.055882996	0.036112629	-0.621560276	0.100285038	0.375734966	0.116820315	0.02635899	-0.019731233	0.069983942
PercentDaysWithRain_3	0.151445468	0.078378171	-0.312094131	-0.017280368	0.223072272	-0.20604595	0.078433715	-0.002504946	0.03616249	0.281952416
PercentDaysWithRain_4	-0.220747371	0.048788929	0.022296803	-0.185485972	0.466806638	0.027837443	0.003619346	-0.046440682	-0.306779123	-0.040859967
PercentDaysWithRain_5	-0.236650224	-0.092097634	-0.191234662	0.183666011	0.255665841	0.040091341	-0.059789784	-0.546728185	-0.095773773	0.022520399
GDD_1	-0.154499944	0.856160527	-0.176205367	-0.186158464	-0.045908832	-0.059587694	-0.235608911	-0.128141825	-0.174476065	-0.166416228
GDD_2	0.265275797	0.837315695	0.10330361	0.2549523	0.067465375	0.057690561	0.063194653	-0.139778785	-0.099631487	0.08560394
GDD_3	0.658882379	0.542533815	0.017877114	0.149816066	-0.031217778	0.112910357	0.011740794	-0.054567934	-0.082485568	-0.136935804
GDD_4	0.878010091	0.225557777	0.089991073	0.043555931	0.049735915	0.036320178	0.026324074	-0.166149098	-0.115268191	-0.200898285
GDD_5	0.877044817	-0.016575011	0.01088935	0.058049376	0.009442158	-0.027589369	0.082460455	-0.19985707	-0.010953709	0.065273122
MeanPhoto_1	-0.93355197	0.044916611	-0.020202659	0.008662074	0.037470252	0.325670335	-0.040246086	0.022062023	0.101326276	-0.056654975
MeanPhoto_2	-0.742864531	-0.193137956	0.050033694	-0.010515957	0.15716528	0.604626816	-0.016881353	-0.041517725	0.113884064	-0.001077155
MeanPhoto_3	0.046566334	-0.537519539	0.142090565	-0.030258329	0.291261933	0.748647014	0.046189698	-0.136832328	0.075132236	0.112608887
MeanPhoto_4	0.76094156	-0.481635889	0.132438533	-0.04195132	0.198909463	0.297152842	0.072899854	-0.126050424	-0.029386963	0.126575691
MeanPhoto_5	0.928872091	-0.297592448	0.112927364	-0.024751476	0.092902998	0.024605212	0.02697174	-0.032942132	-0.052651021	0.112538846
MeanGHI_1	-0.464985751	0.396820263	-0.005560098	0.145053298	-0.178255751	0.277198361	-0.661713935	0.004849769	-0.036113505	-0.191825156
MeanGHI_2	0.109434763	0.021227727	0.094758657	0.839374327	-0.035455432	0.336113046	-0.146640168	-0.003851764	0.014458825	0.07149887
MeanGHI_3	0.472236924	-0.159482088	0.082455683	0.32030463	-0.221739841	0.582120922	0.015761329	0.037221804	-0.010887474	-0.081011534
MeanGHI_4	0.89548164	-0.130350074	0.07404532	0.131467026	-0.218399472	0.062829692	-0.005737029	0.00993112	0.038159971	0.04873275
MeanGHI_5	0.930485032	-0.091841231	0.101742315	0.03270656	-0.051337779	-0.104503741	0.084863611	0.257188459	-0.117481886	0.091574417
MeanPeakGHI_1	-0.163623526	0.452354663	-0.016426195	0.183993632	-0.259873446	0.233457602	-0.699415715	0.018731	-0.111069604	-0.240249293
MeanPeakGHI_2	0.34220209	0.072173065	0.011301739	0.803968515	-0.101965128	0.095030212	-0.189366057	-0.012001943	-0.042824863	0.029451709
MeanPeakGHI_3	0.703831522	0.024049223	-0.03068206	0.327967335	-0.23043753	0.306423578	-0.07048779	0.089526399	-0.029227343	-0.104002111
MeanPeakGHI_4	0.916474363	-0.085284877	0.022552824	0.143655579	-0.178225188	0.024333966	-0.037170146	0.044504681	0.014829824	0.034674803
MeanPeakGHI_5	0.950285053	-0.012785921	0.074875122	0.085664982	-0.044534111	-0.062286055	0.062041415	0.209830997	-0.120666961	0.081271675
